# Supplementary material
Source: Springer Nature journal article supplement (https://www.springermedizin.de/resource/supplementary/12967_2013_2109_MOESM3_ESM.pdf/9574904)

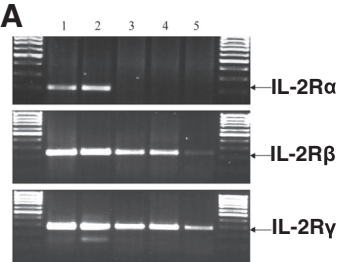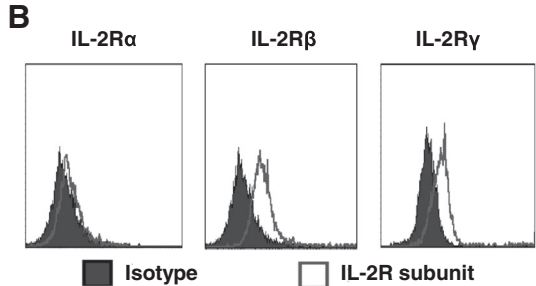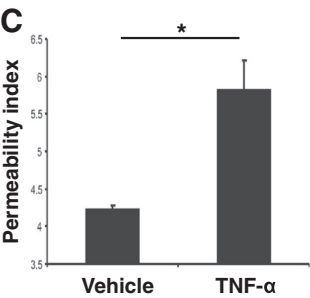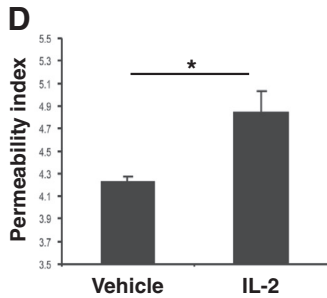

Supplement: MOESM3 [file 9574904]
